# Supplementary material
Source: MDPI journal article supplement (https://www.mdpi.com/1996-1073/16/9/3700)
Supplement: s1 [file s1]

**Supporting Information**  
**The Relevance of Lithium Salt Solvate Crystals in Superconcentrated Electrolytes in Lithium Batteries**

| Lattice Parameters                   | LiMPSA-MeCN          | LiTFSI-MeCN          | LiDFOB-MeCN          | LiBOB-MeCN           |
|--------------------------------------|----------------------|----------------------|----------------------|----------------------|
| space group                          | monoclinic, $P2_1/n$ | Monoclinic, $P2_1/n$ | orthorhombic, $Pnma$ | monoclinic, $P2_1/n$ |
| a, b, c ( $\text{\AA}$ )             | 10.65,20.46,10.03    | 10.84,11.02,19.12    | 8.02,6.37,24.64      | 7.75,22.37,15.01     |
| $\alpha, \beta, \gamma$ ( $^\circ$ ) | 90.0,96.0,90.0       | 90.0,91.3,90.0       | 90.0,90.1,90.0       | 90.0,92.2,90.0       |
| $V$ ( $\text{\AA}^3$ )               | 2173.0               | 2284.4               | 1259.1               | 2600.2               |
| density ( $\text{g/cm}^3$ )          | 1.51                 | 1.91                 | 1.41                 | 1.51                 |

Table S1: DFT optimized lattice parameters for salt-MeCN solvate crystals in this study.

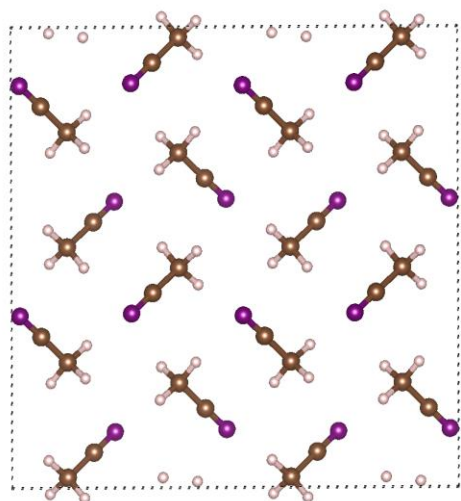

Figure S1: The crystal structure of MeCN solvent. From DFT calculation, the binding energy ( $E_b$ ) of this MeCN molecular solid is  $\sim 0.45$  eV/MeCN. Color of atom: N (purple), C (brown), H (white).

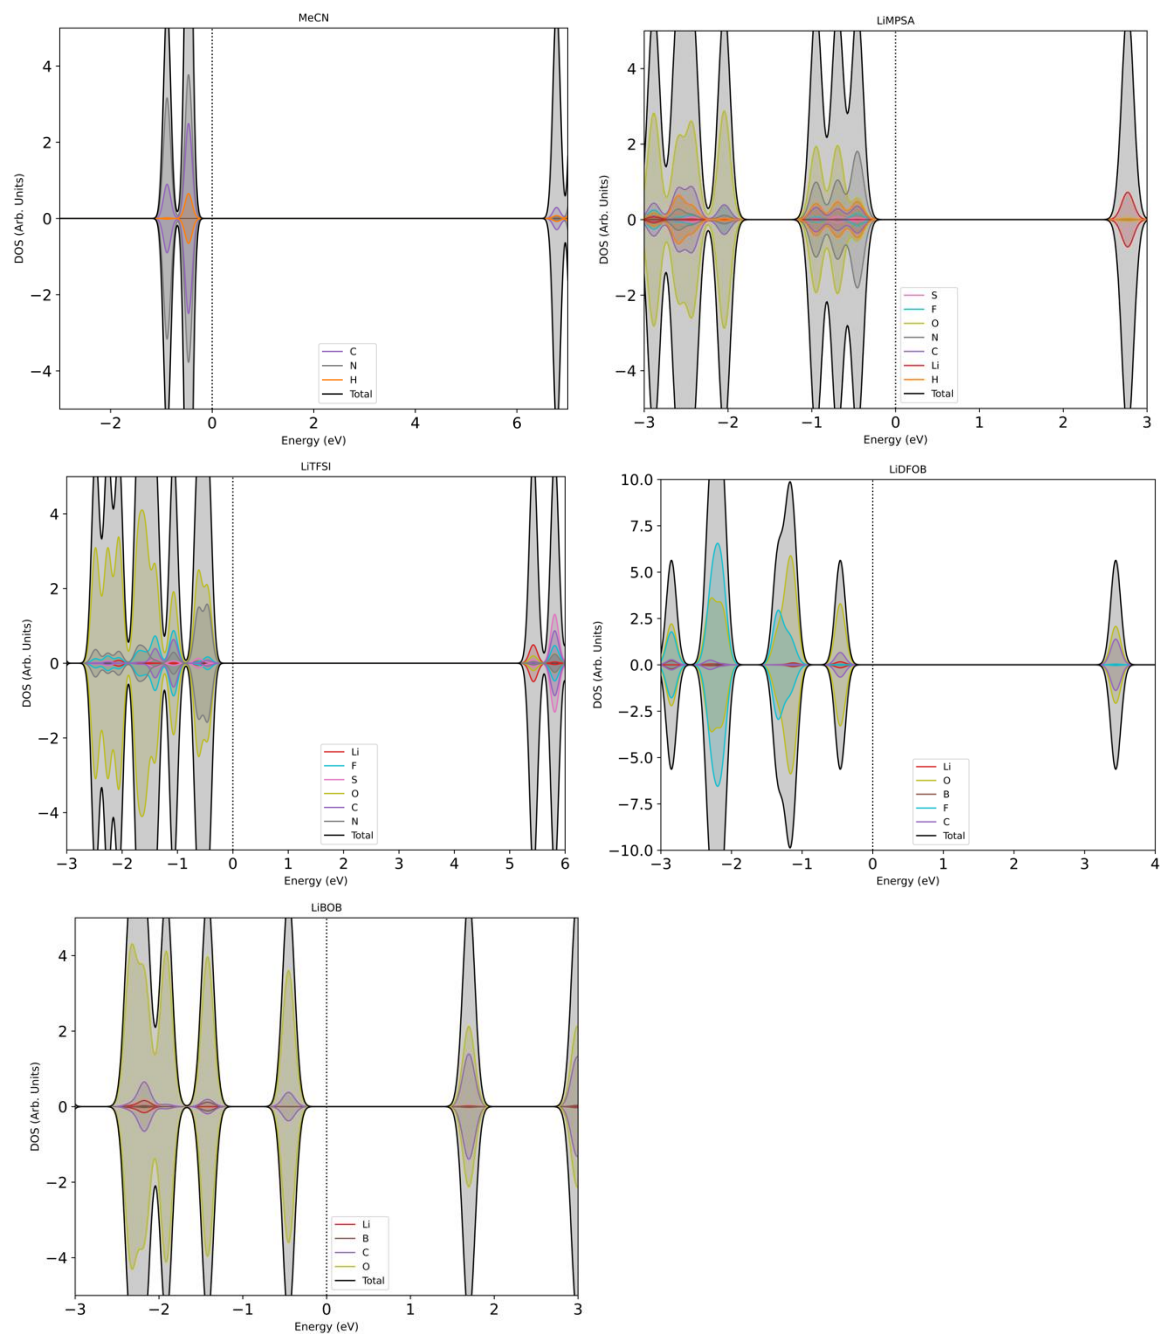

Figure S2: Site projected electron density of states (e-DOS) of pristine MeCN, LiMPSA, LiTFSI, LiDFOB, and LiBOB molecule. All these molecules are found to have large HOMO-LUMO gap. The Fermi level,  $E_f$  is represented by dotted vertical line and referenced as zero in energy level.

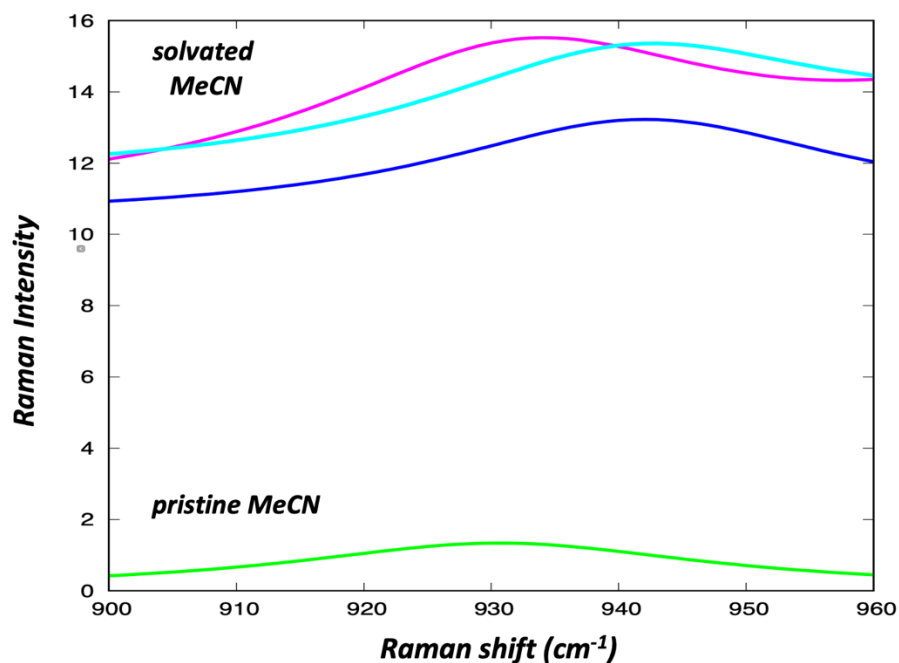

Figure S3: Quantum chemical method simulated Raman spectra that highlight the difference between a pristine MeCN solvent molecule and  $\text{Li}^+$  coordinated MeCN in  $\text{LiTFSI}-(\text{MeCN})_2$  (neutral/anionic/cationic) solvate molecule regarding to C-C stretching mode ( $\nu \sim 930 \text{ cm}^{-1}$ ) of MeCN molecule. The neutral, anion and cation MeCN-solvate species is represented by line in blue, pink, and light blue, respectively. Compared to Fig. 6 (i.e.  $\text{C}\equiv\text{N}$  stretching of MeCN) in the main text, a systematic upshift is not found in C-C stretching mode. Therefore, we suggest that the Raman signature of  $\text{C}\equiv\text{N}$  stretching of MeCN is more suitable to probe of charged species of salt-MeCN solvate molecules.
